# Supplementary material for: Confined crystallization of fenofibrate in nanoporous silica
Source: Royal Society of Chemistry journal article supplement (doi:10.1039/c5ce01148e), 2015-01-01

## Supplementary Information

### I: Individual DSC Scans: one trial of each pore size shown as a representative

a. 12 nm CPG

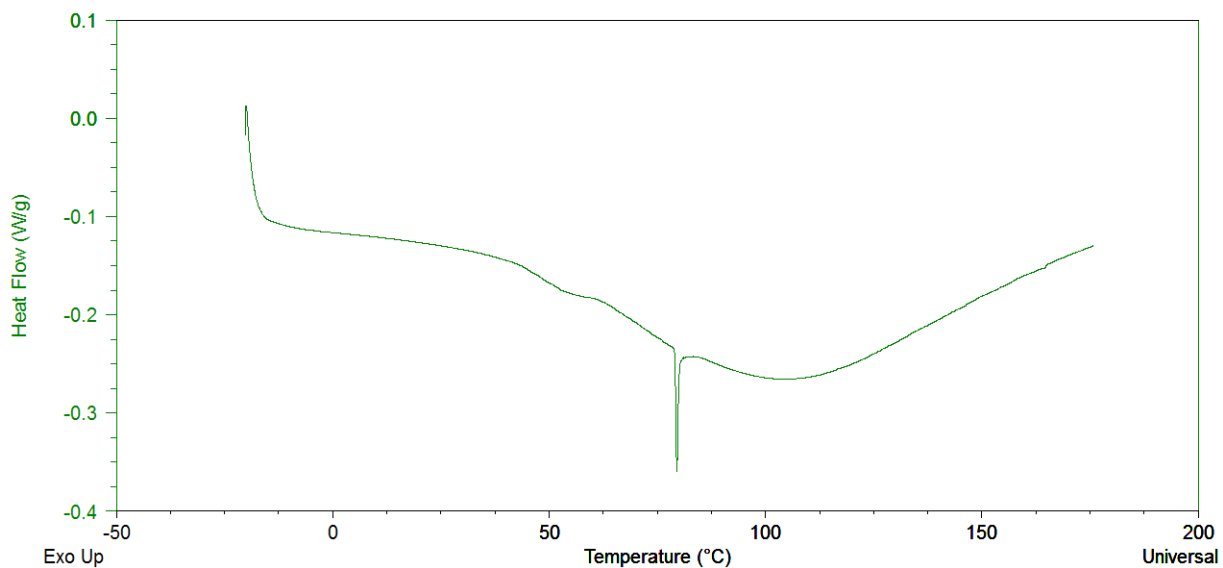

b. 20 nm CPG

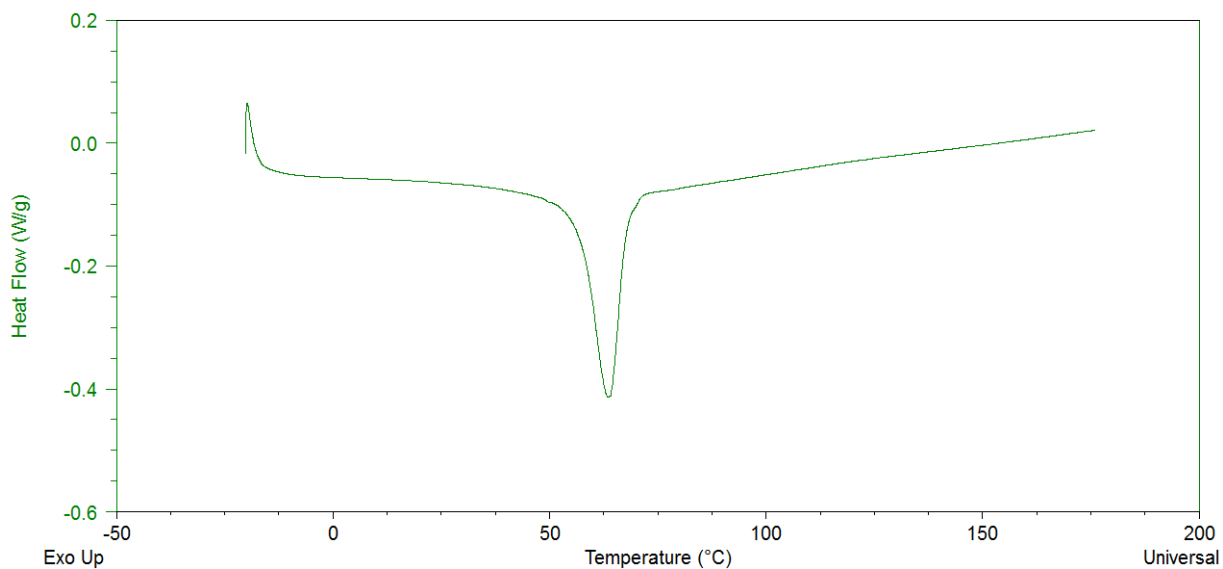

c. 30 nm CPG

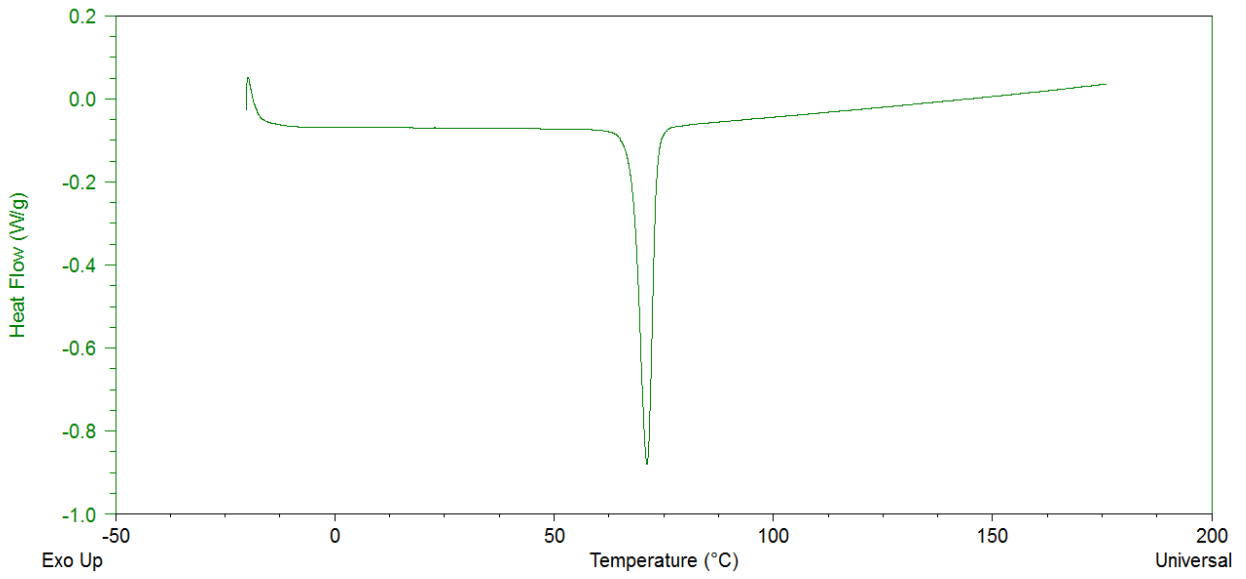

d. 38 nm CPG

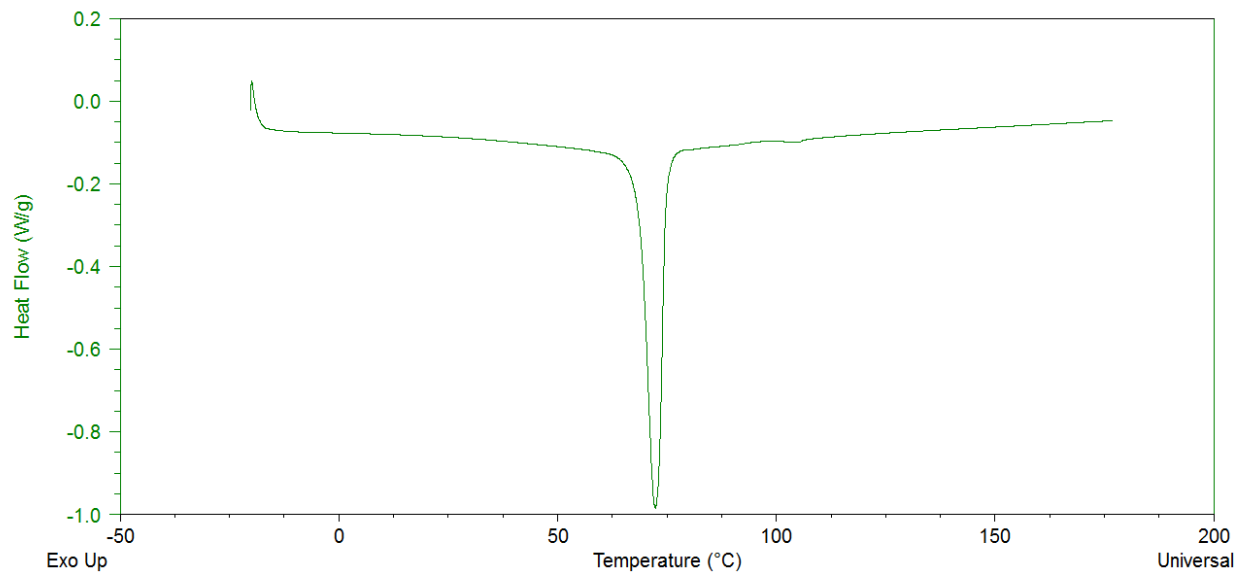

e. 53 nm CPG

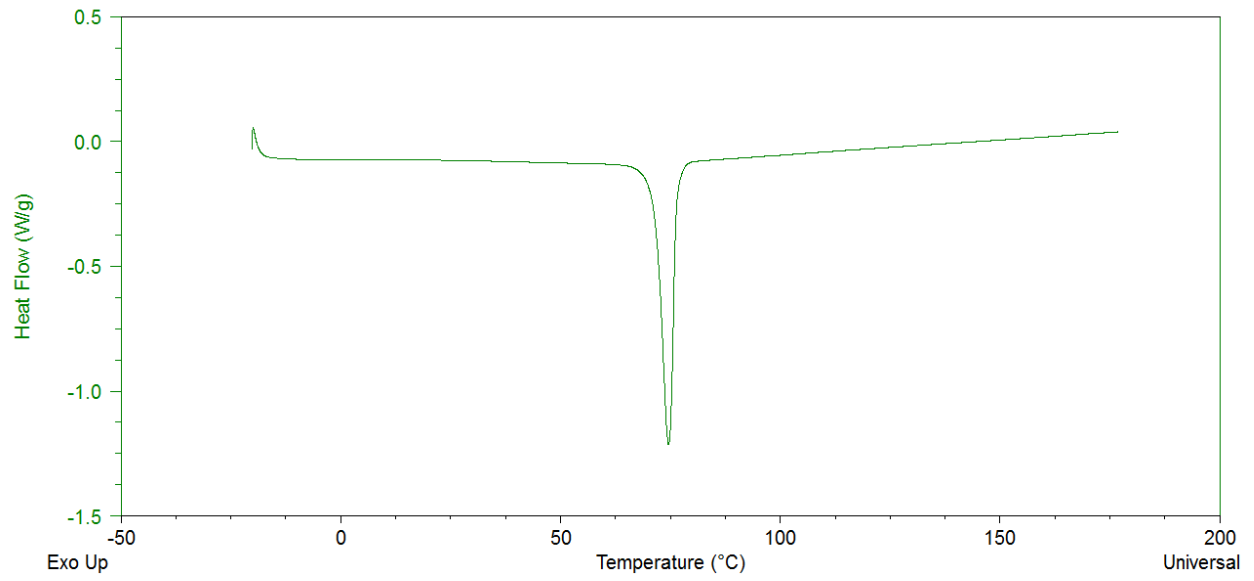

f. 70 nm CPG

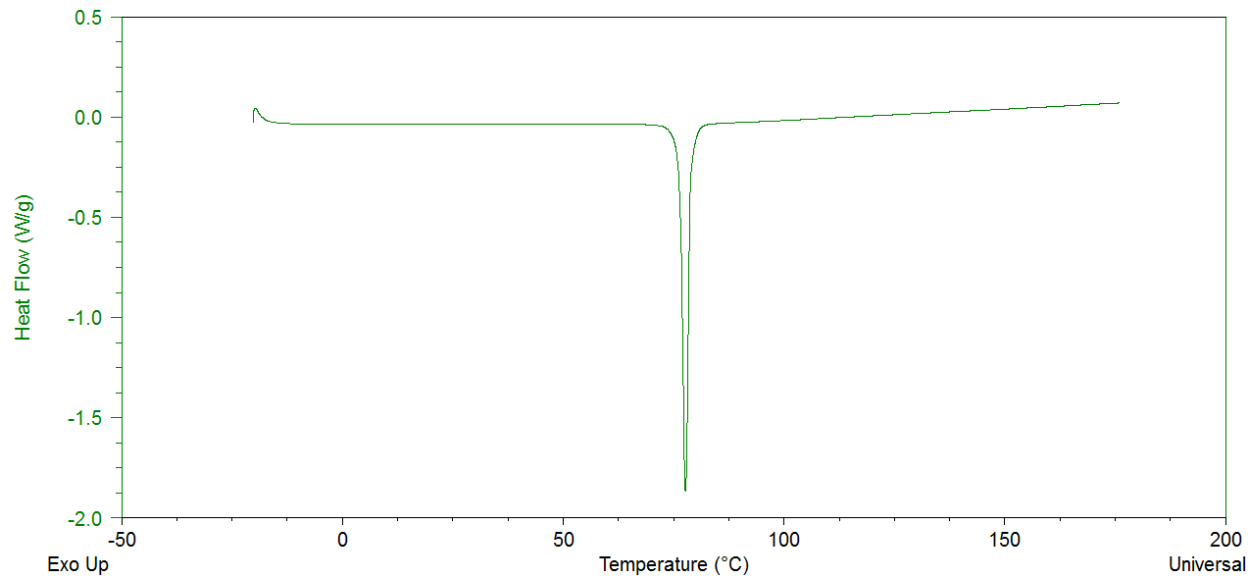

g. 105 nm CPG

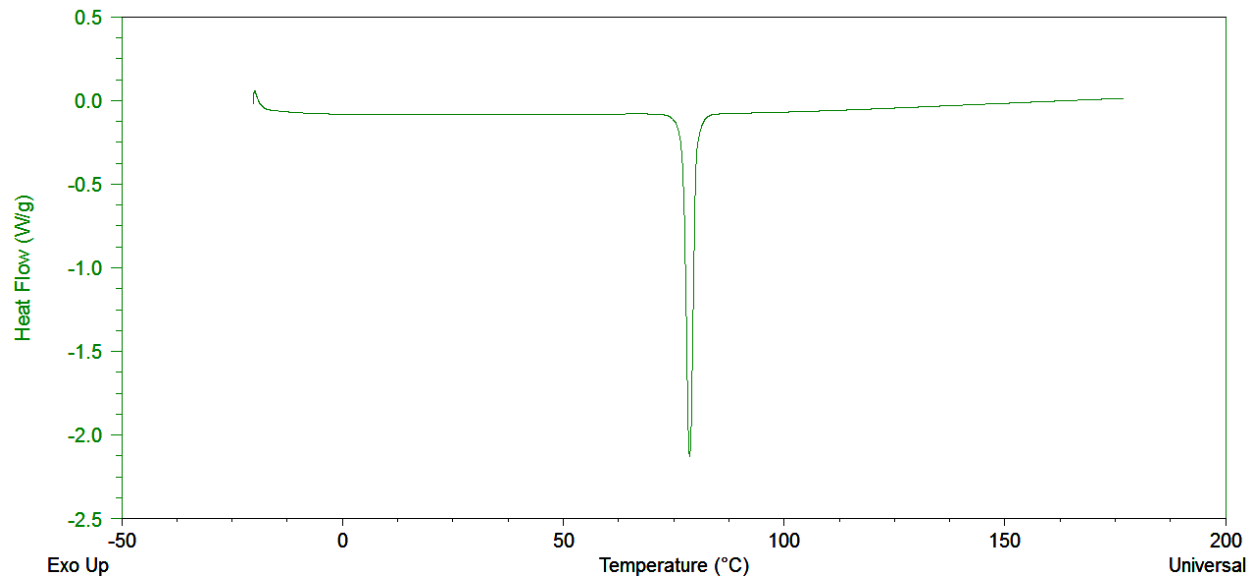

h. 151 nm CPG

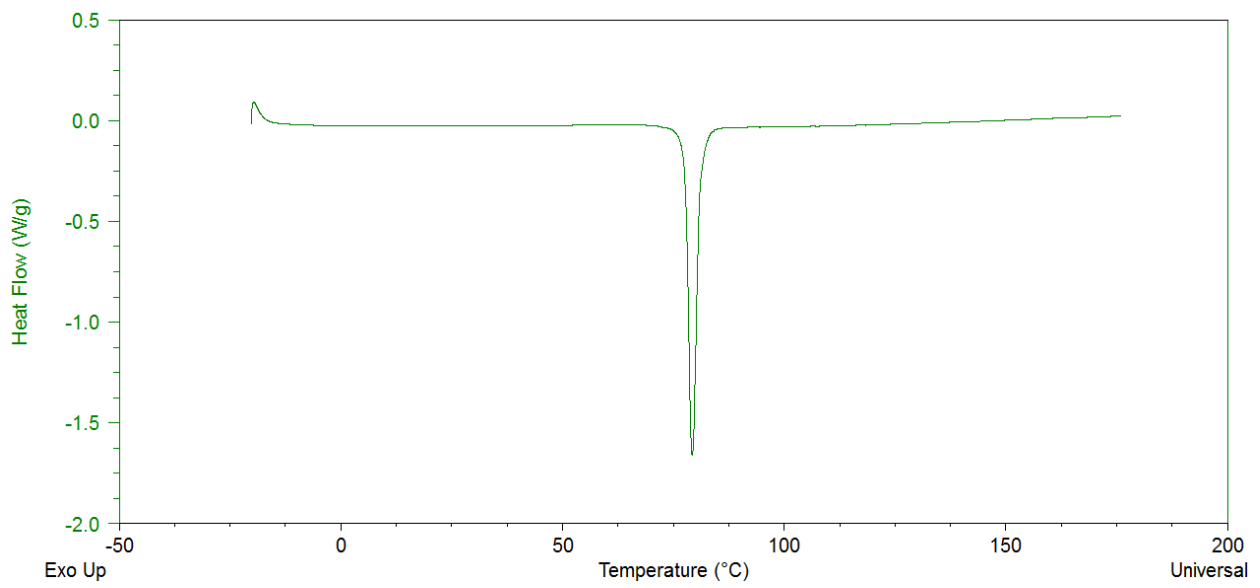

i. 191 nm CPG

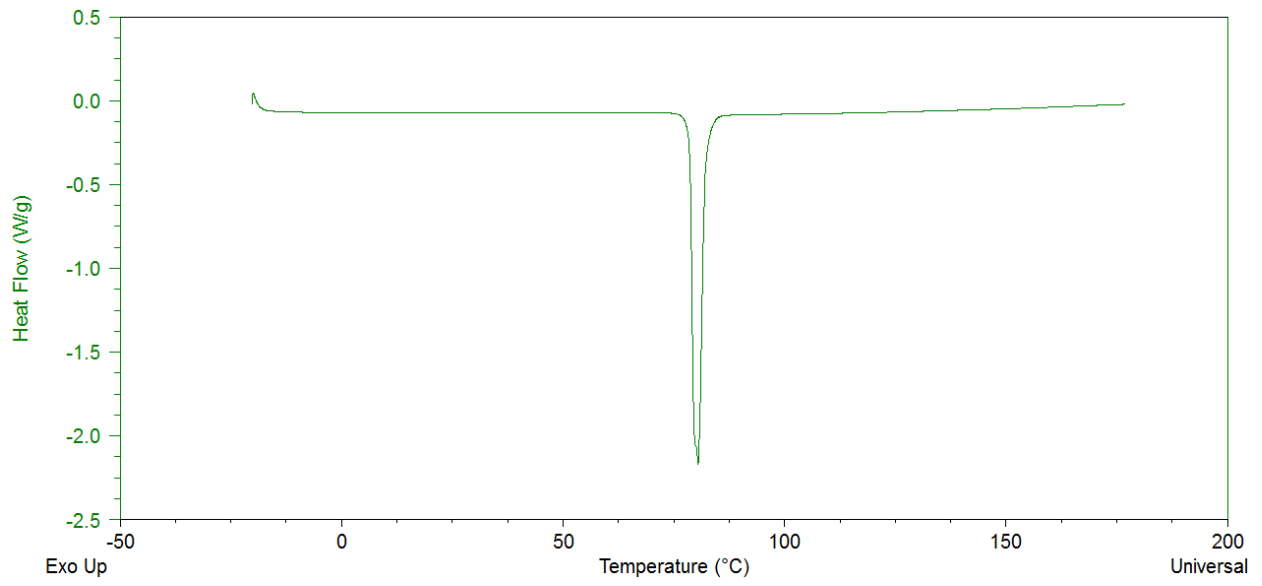

j. 300 nm CPG

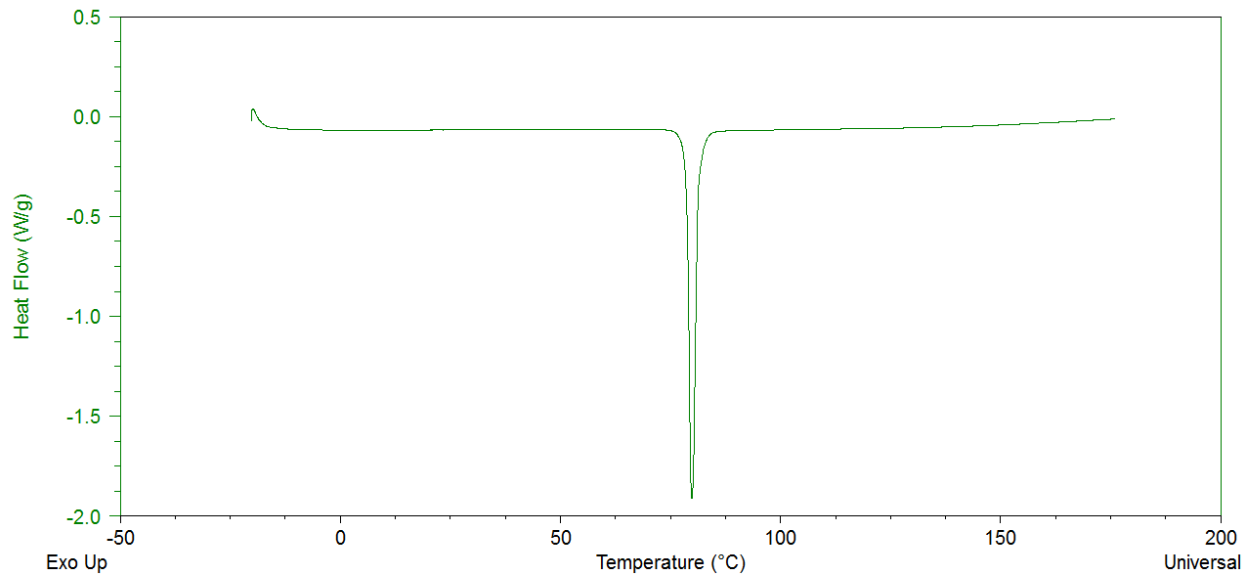

## II. DSC Scan of Poor Quality Preparation: scan of a trial wherein bulk and nano-sized crystals were produced in a sample with CPG of 38.3 nm pore size clearly showing two distinct peaks

Sample: FENinCPG38nmT1S2

DSC File: C:\...138 nm CPG\FENinCPG38nmT1S2.001

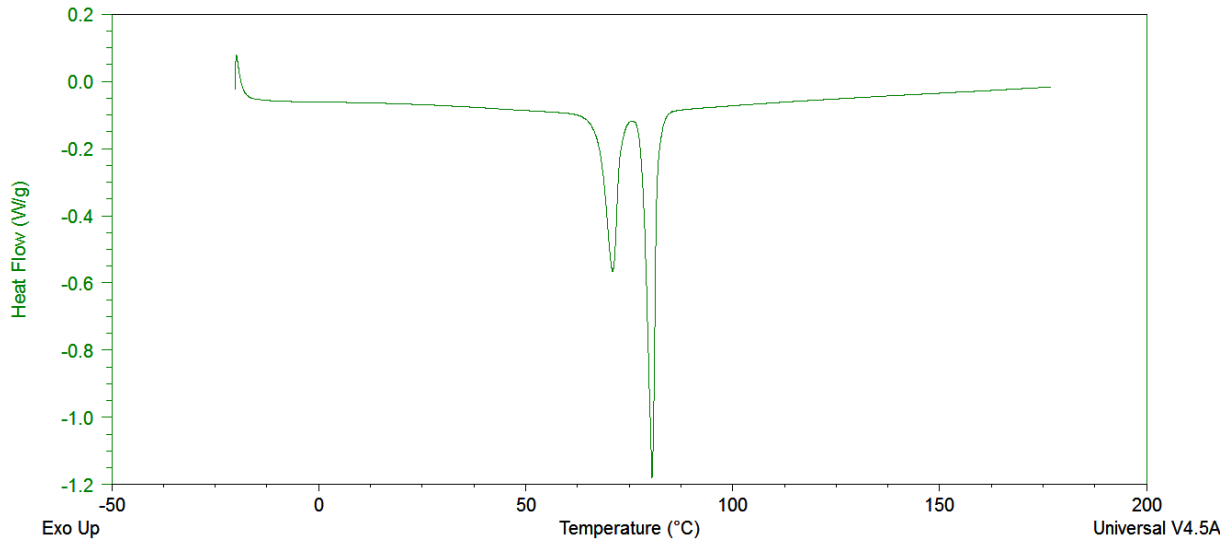

## III. Individual XRPD Scans: one trial of each pore size shown as a representative

a. 12 nm CPG

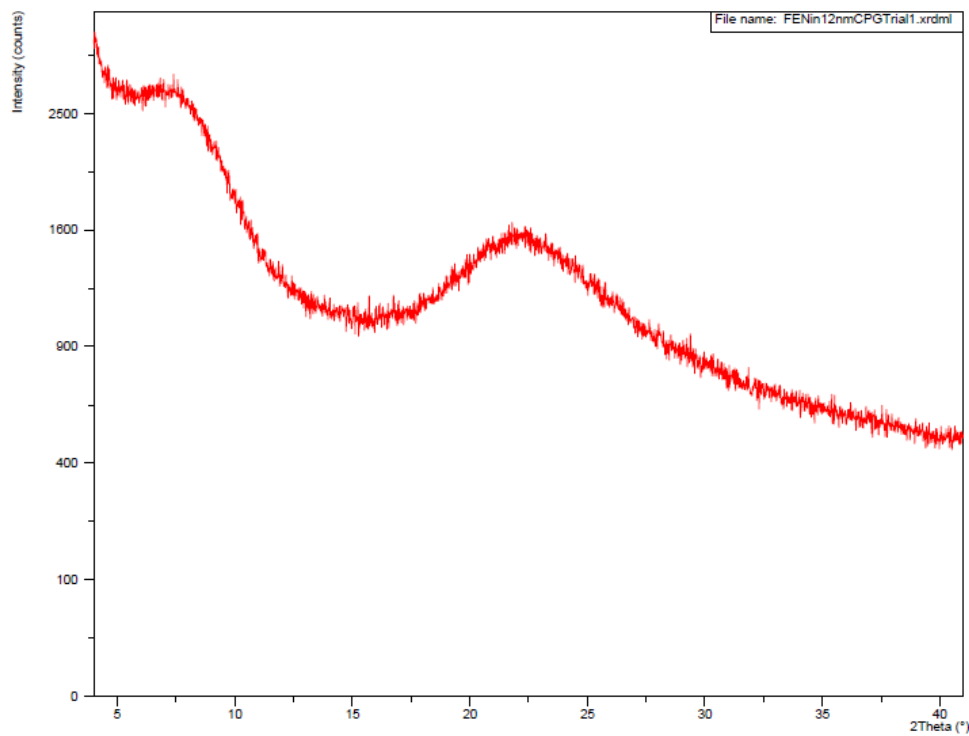

b. 20 nm CPG

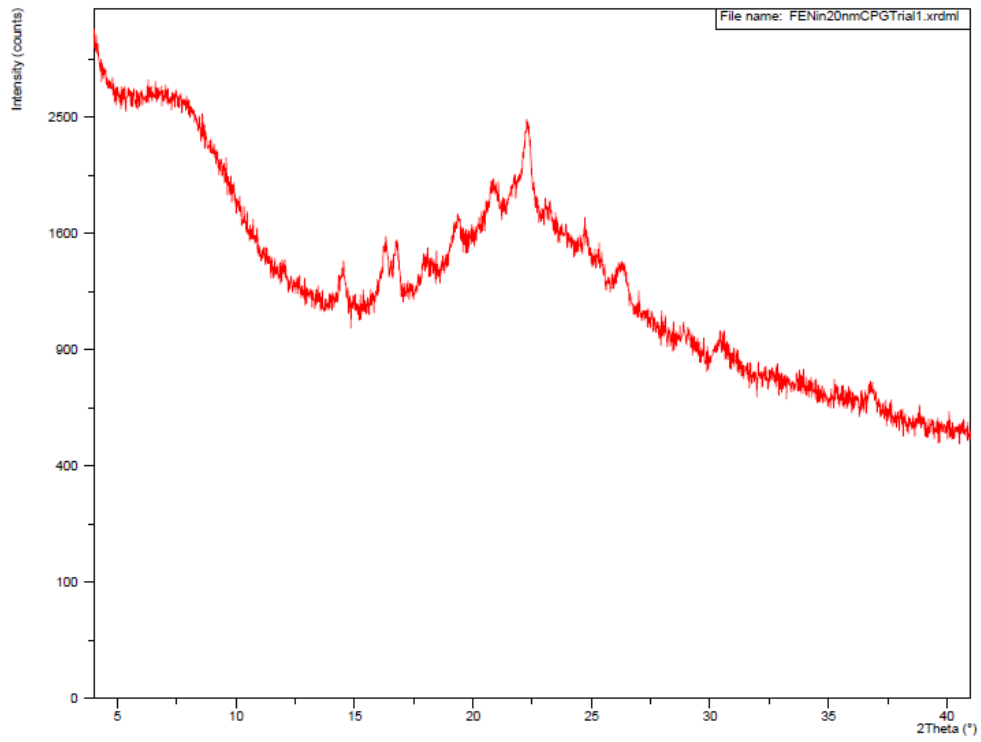

c. 30 nm CPG

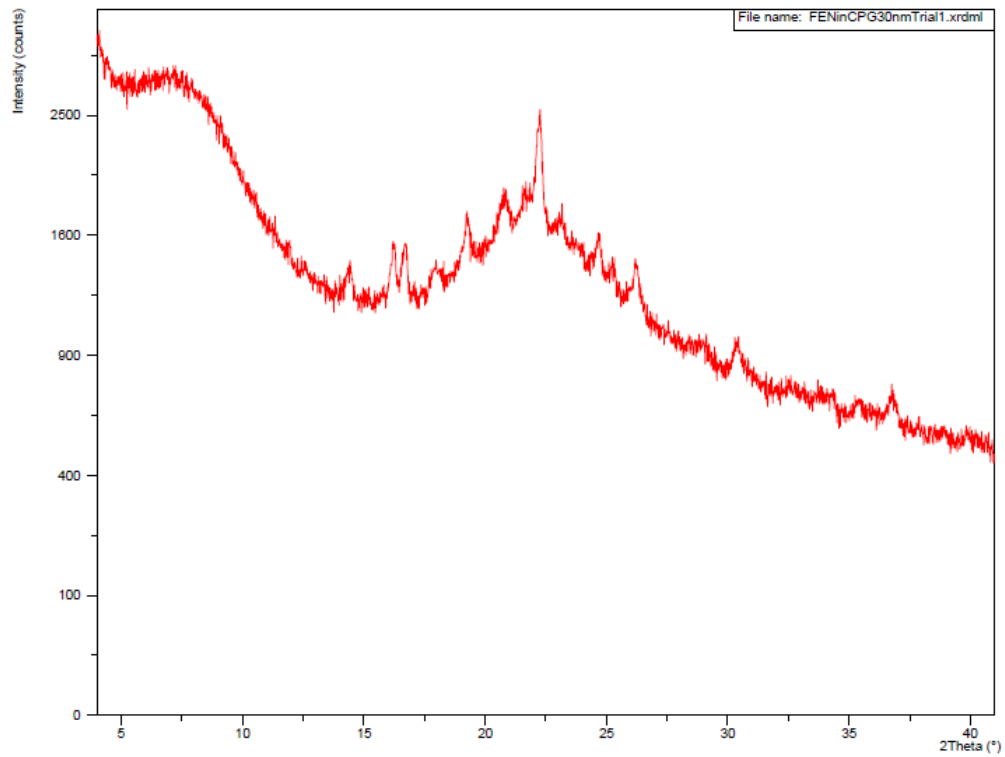

d. 38 nm CPG

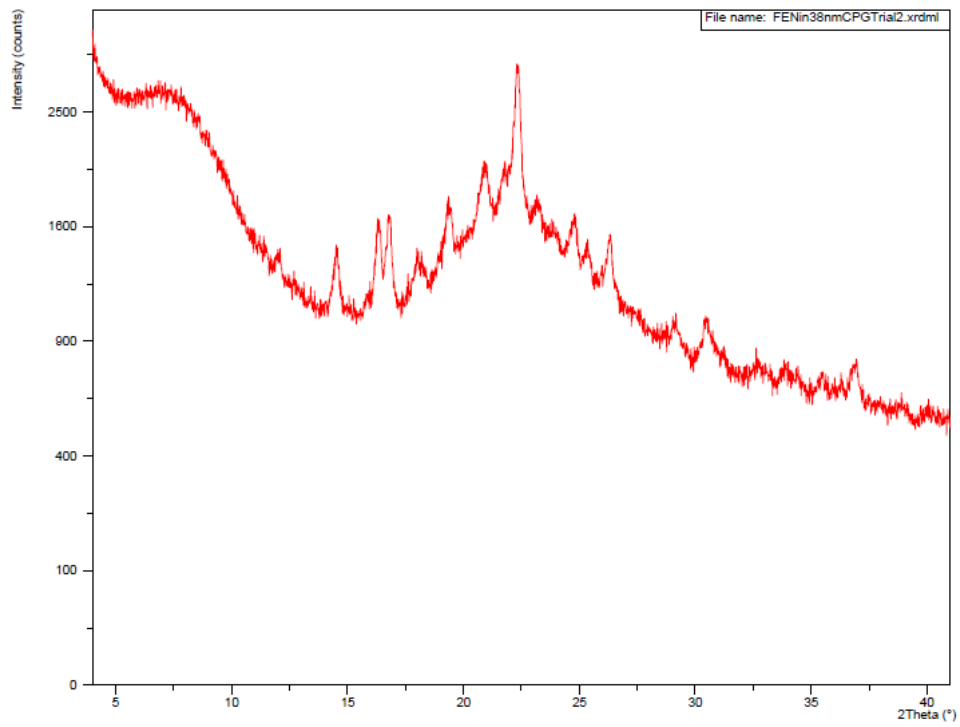

e. 53 nm CPG

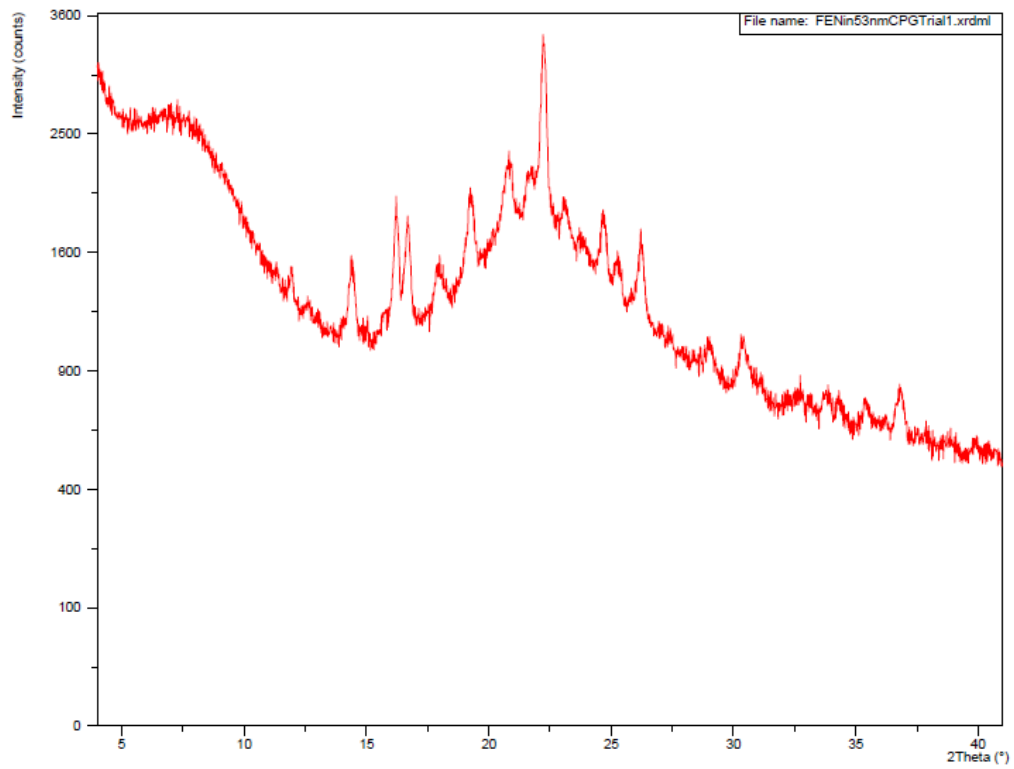

f. 70 nm CPG



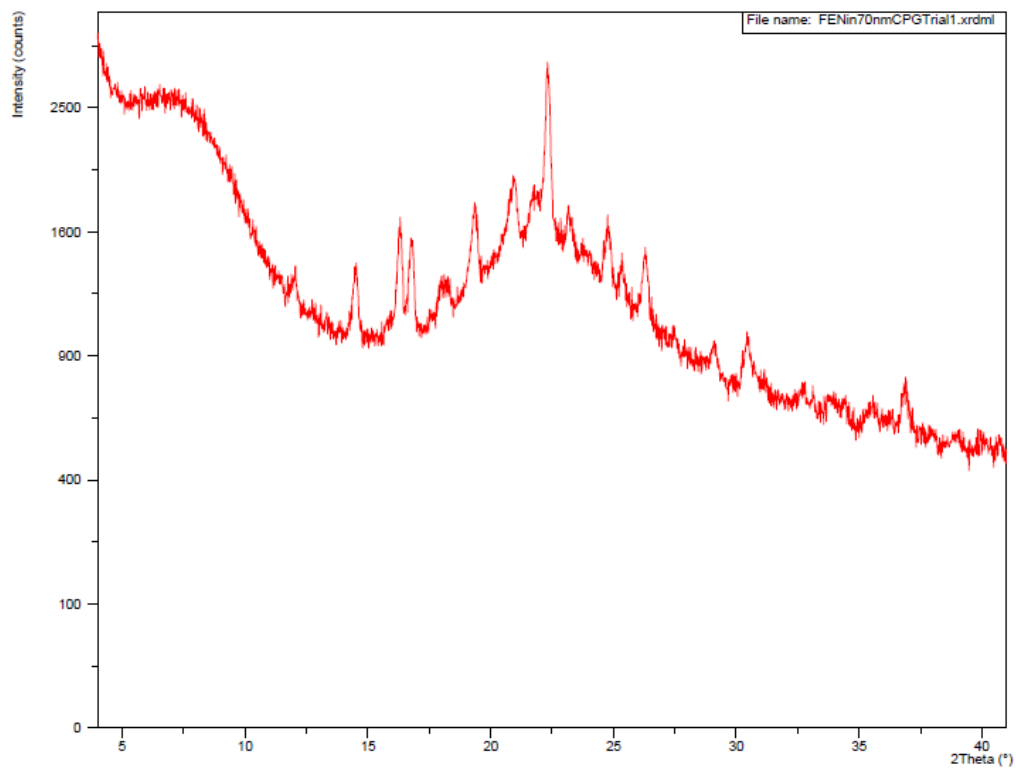

g. 105 nm CPG

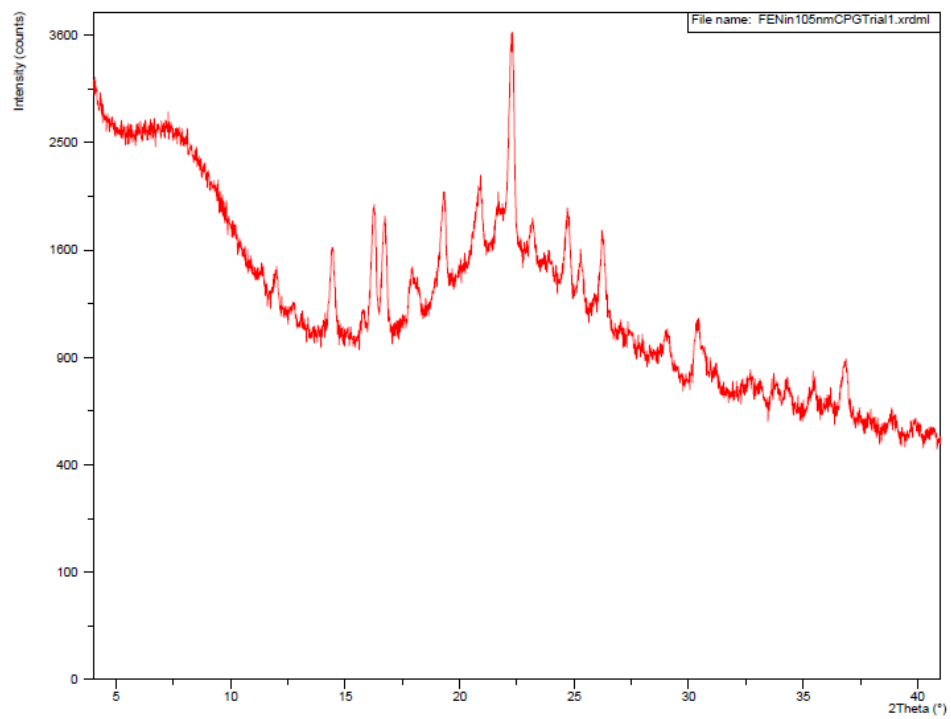

h. 151 nm CPG

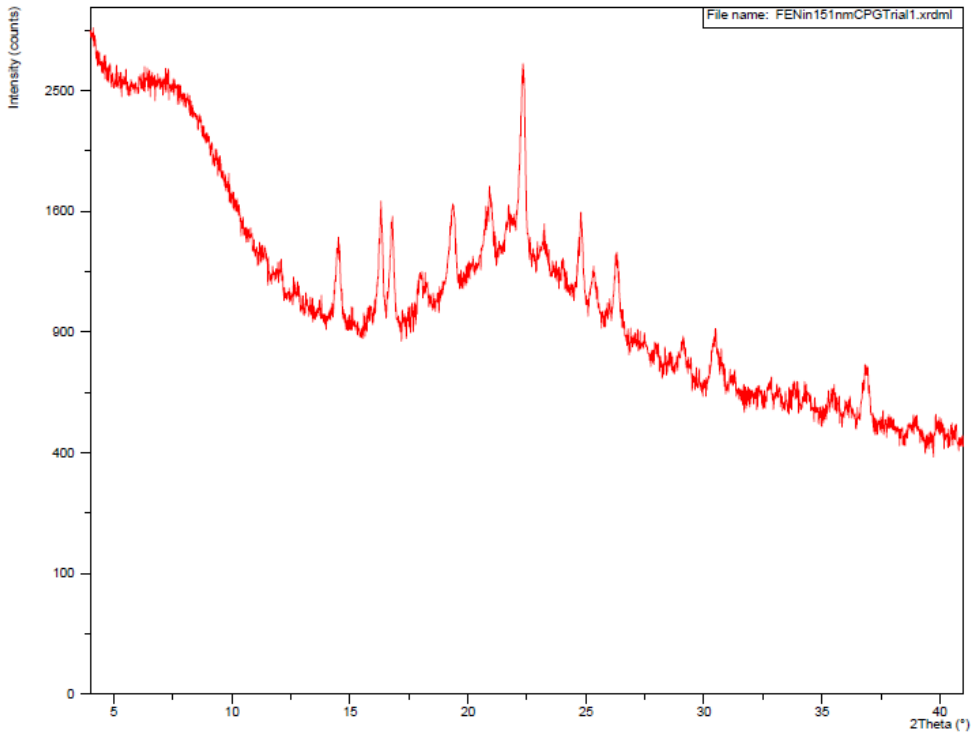

i. 191 nm CPG

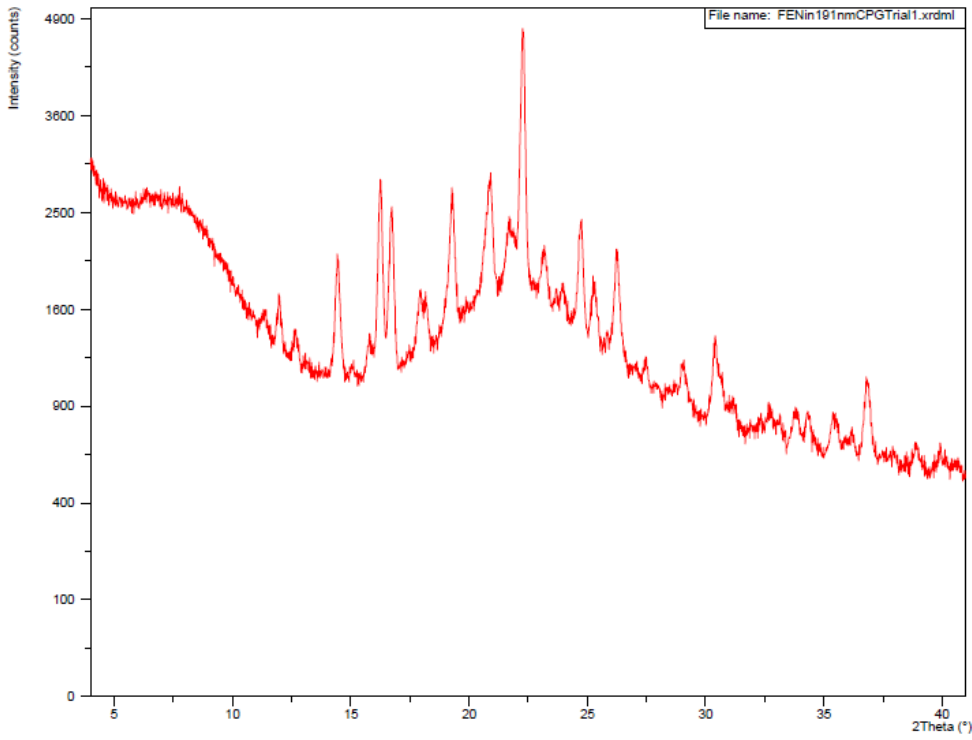

j. 300 nm CPG

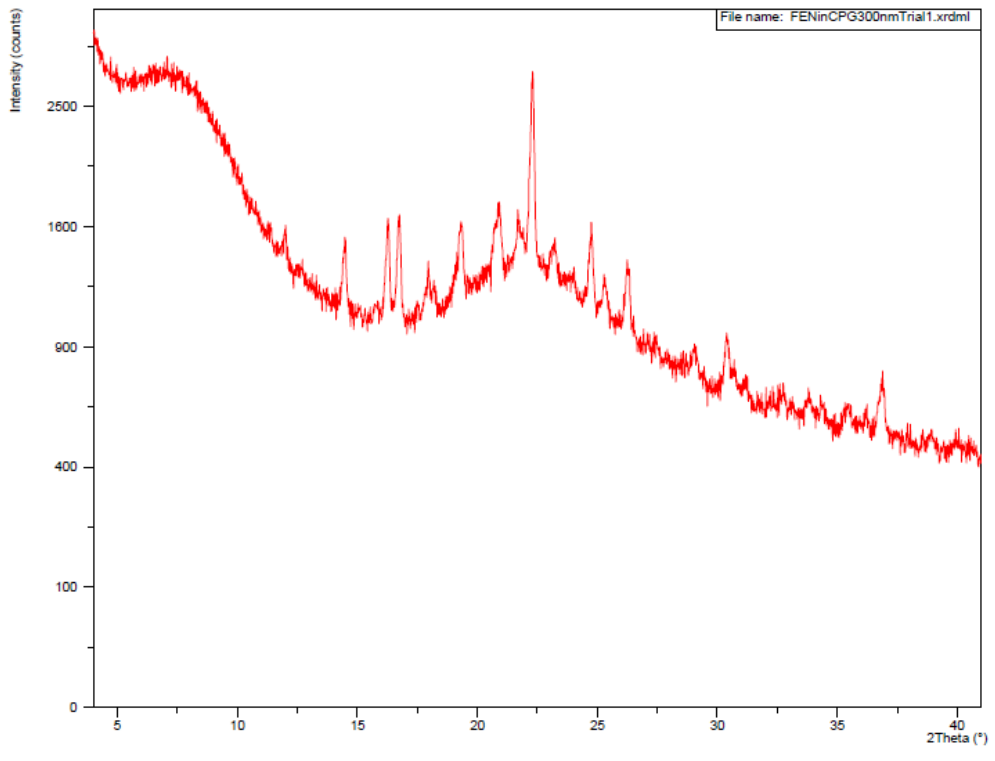

#### IV. Individual ssNMR Spectra: one trial of each pore size shown as a representative

##### a. 12 nm CPG

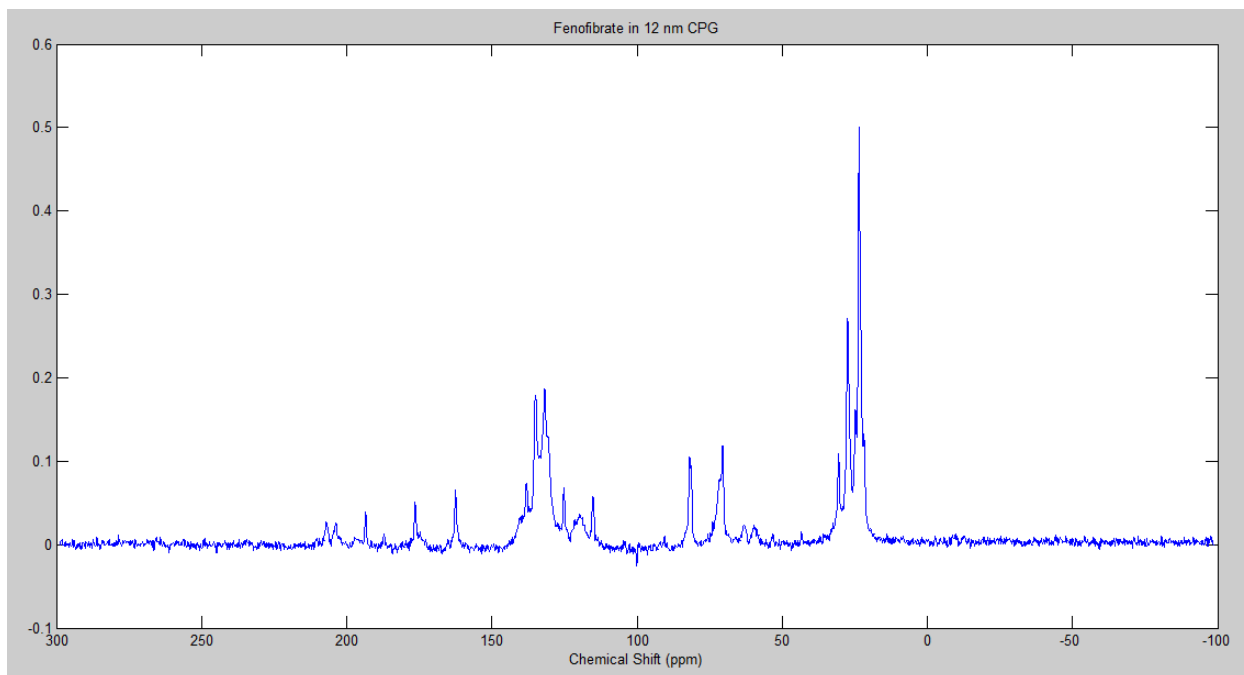

##### b. 20 nm CPG

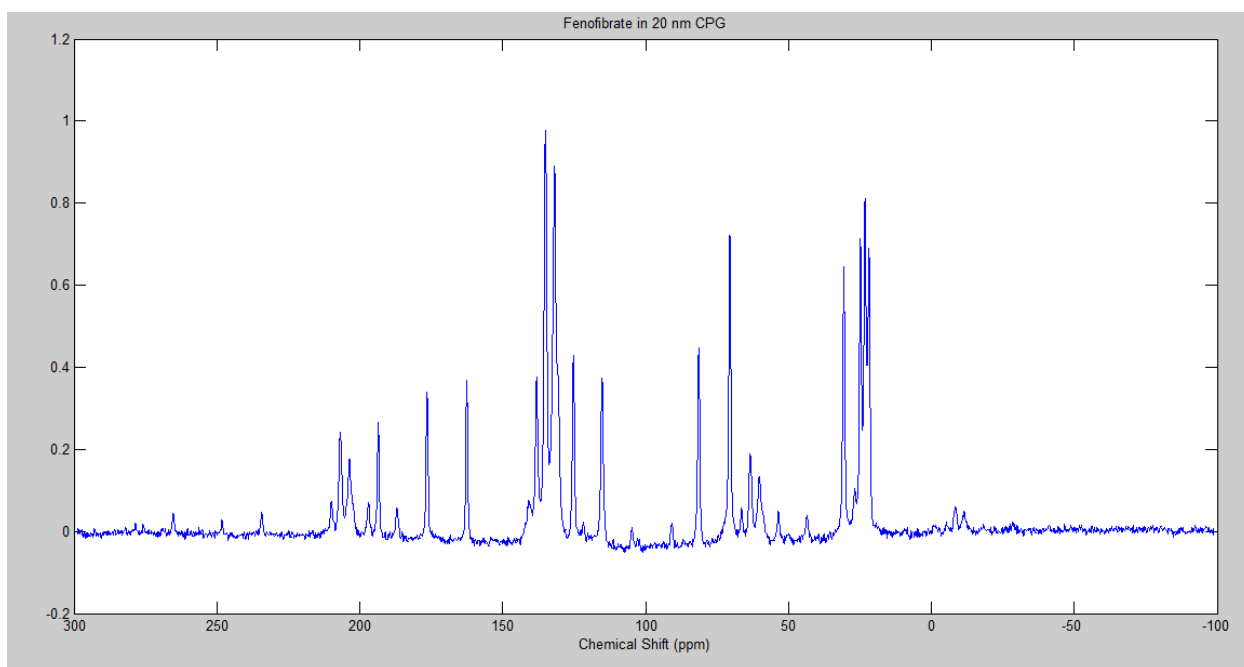

c. 38 nm CPG

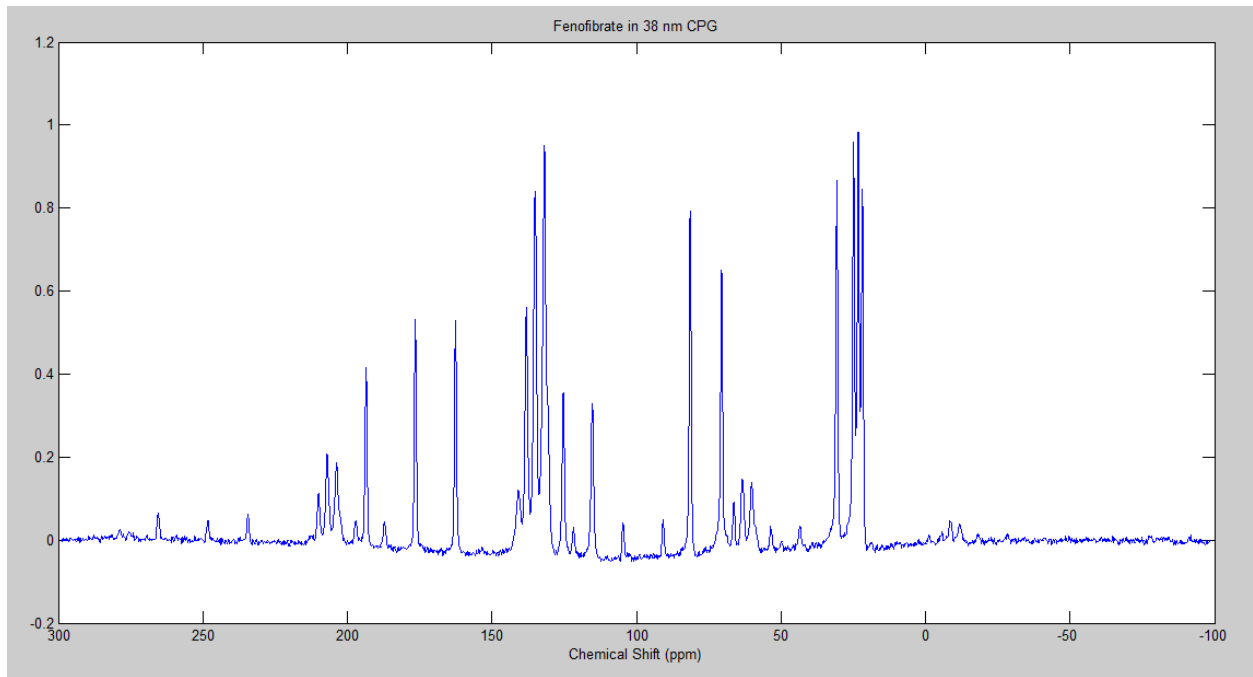

d. 53 nm CPG

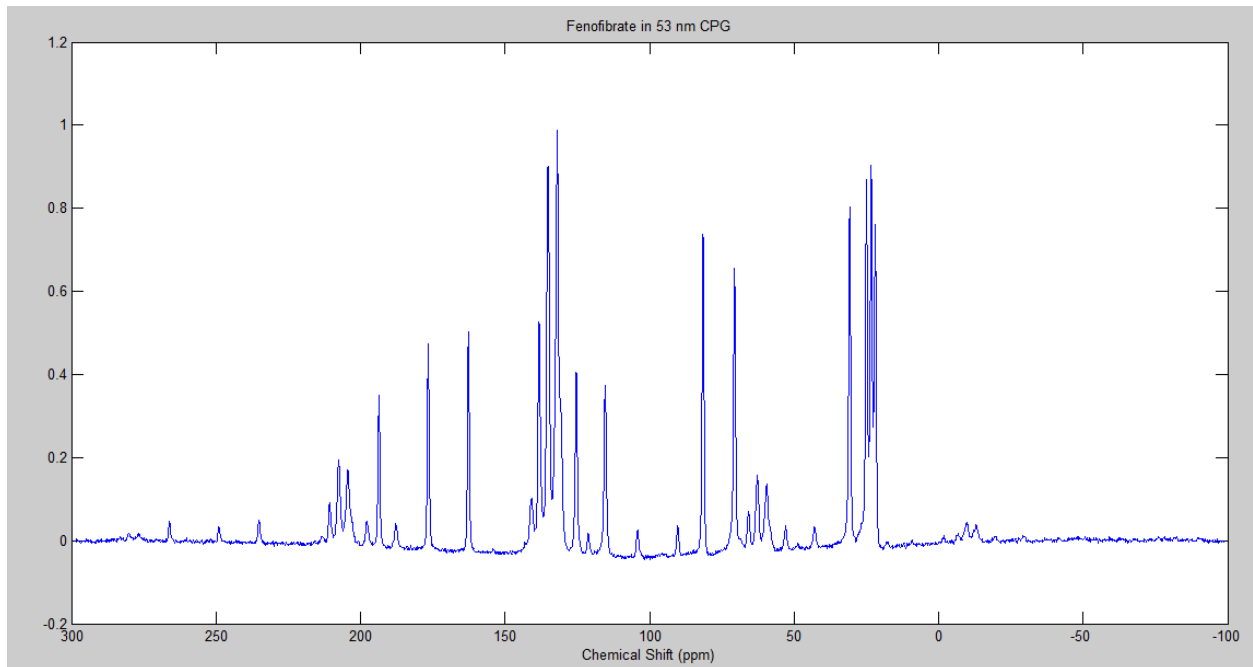

e. 70 nm CPG

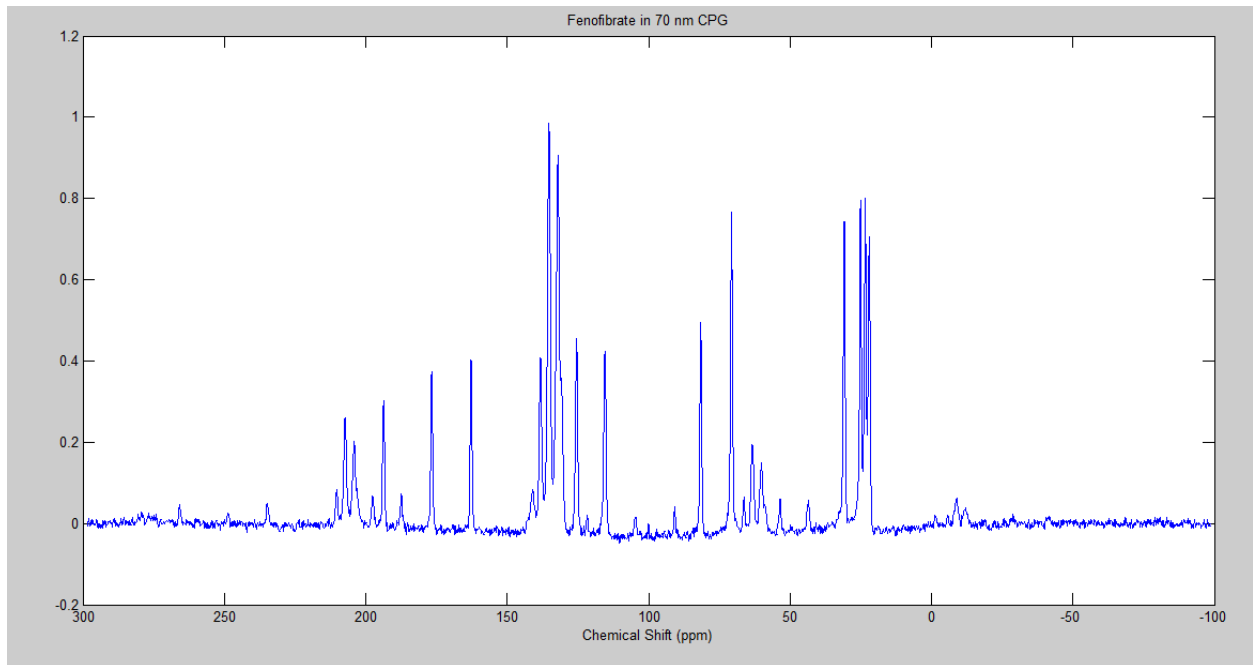

f. 105 nm CPG

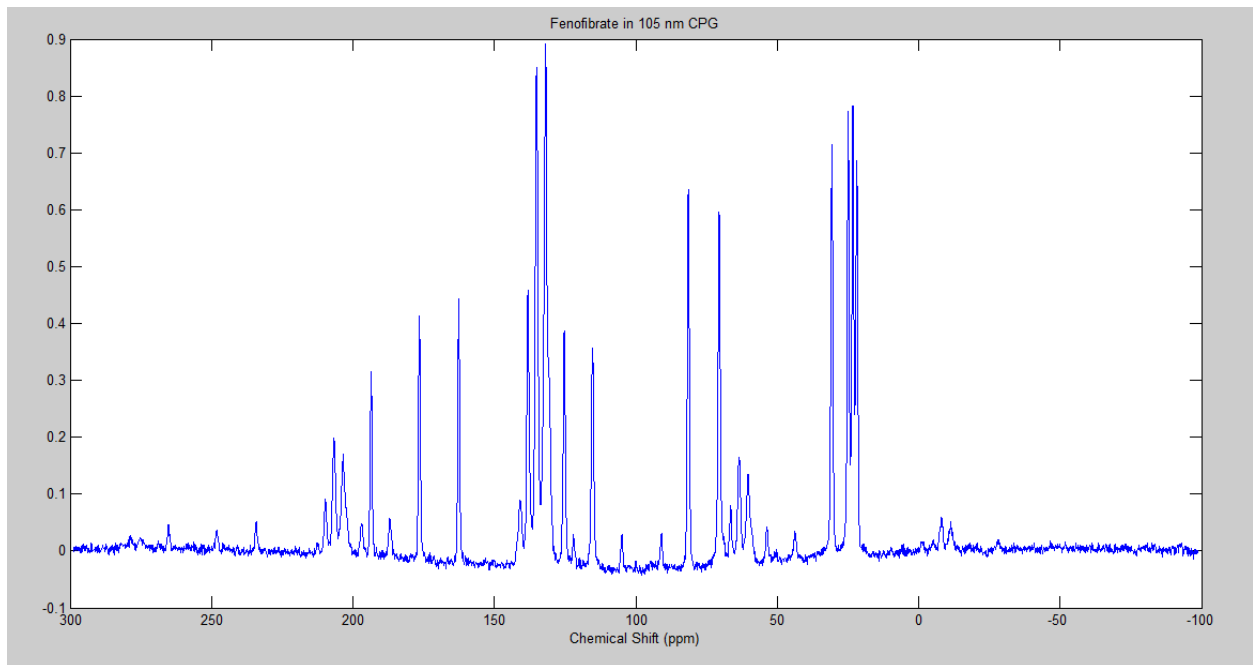

g. 151 nm CPG

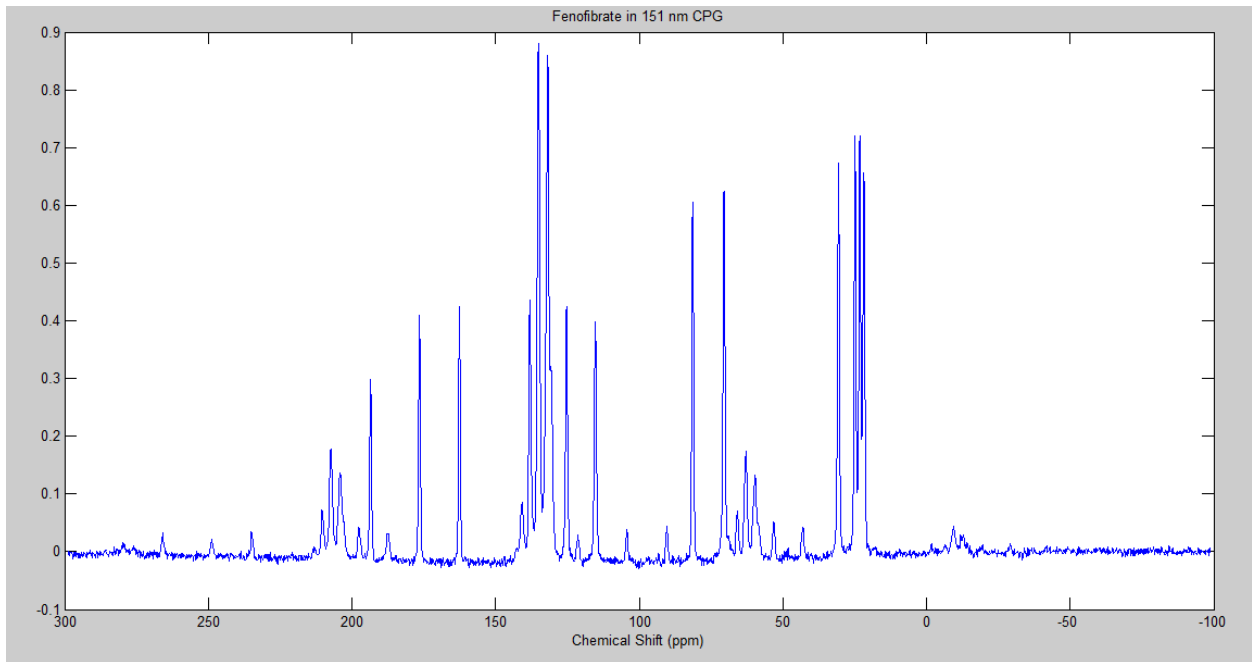

h. 191 nm CPG

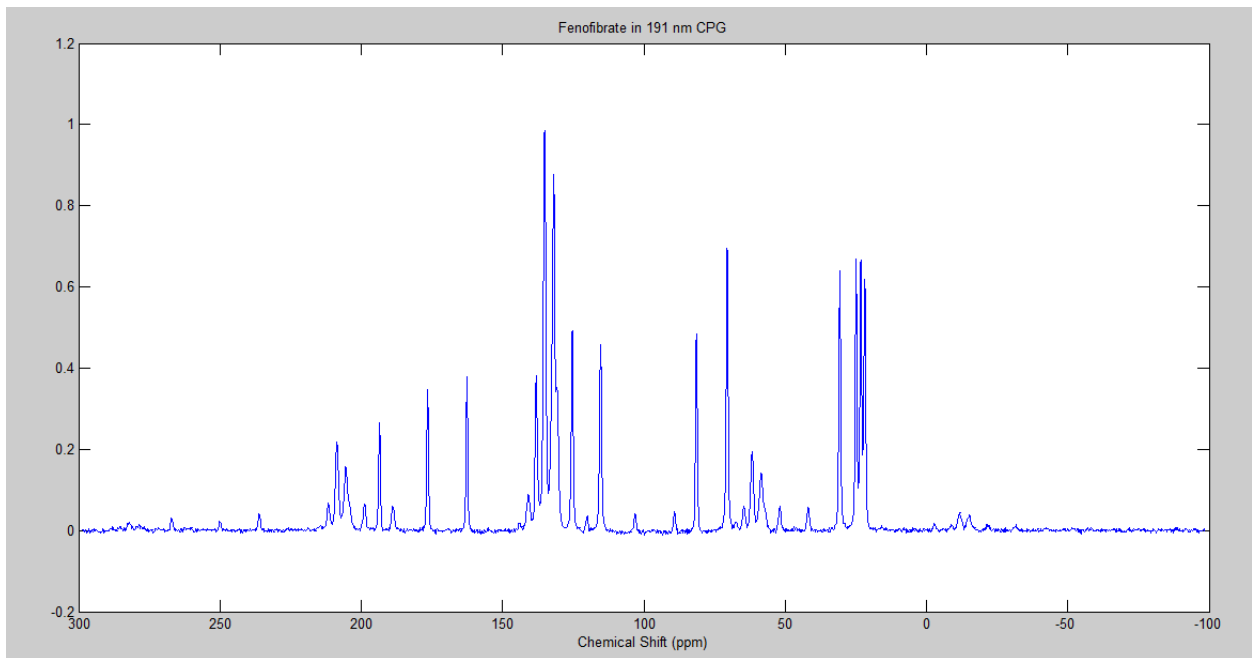

i. 300 nm CPG

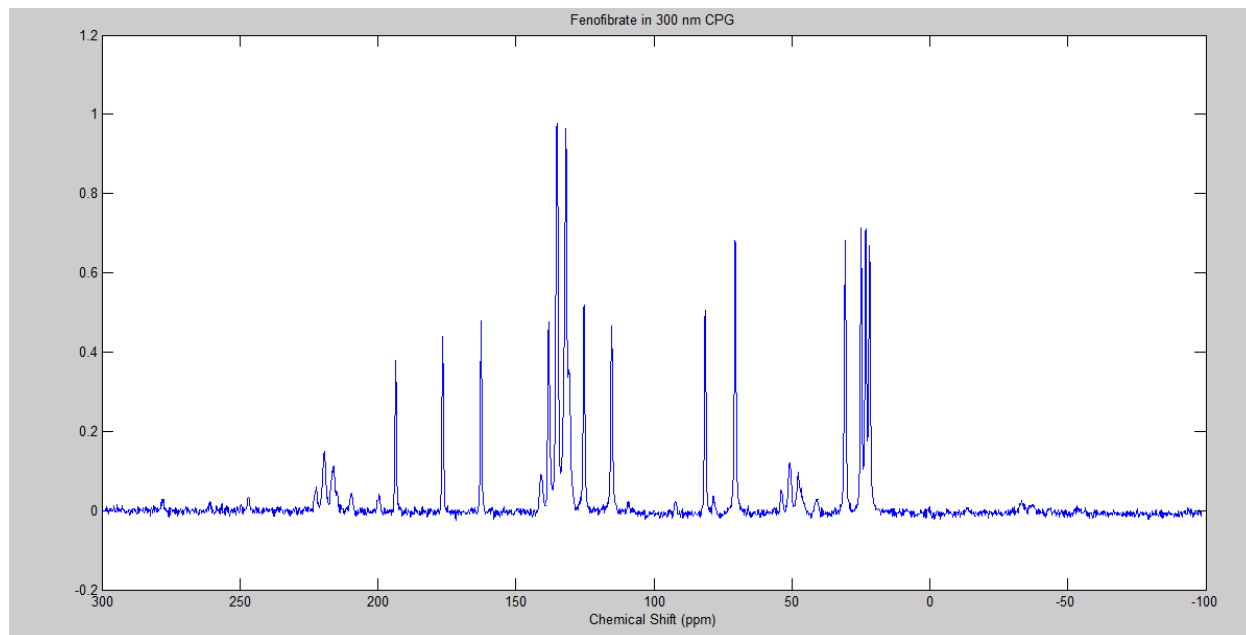

Supplement: c5ce01148e1.pdf [file c5ce01148e1.pdf]
